# Supplementary material for: From Recharge, to Groundwater, to Discharge Areas in Aquifer Systems in Quebec (Canada): Shaping of Microbial Diversity and Community Structure by Environmental Factors
Source: MDPI journal article supplement (doi:10.3390/genes14010001), 2022-12-20
Supplement: s1 [file s1]

**Table S4.** Correlation between the archaeal and bacterial community composition and explanatory factors using db-RDA. DOC, dissolved organic carbon; DO, dissolved oxygen; Arc1, archaeal community composition represented by the first axis of a PCoA; Arc2, archaeal community composition represented by the second axis of a PCoA; Bac1, bacterial community composition represented by the first axis of a PCoA; Bac2, bacterial community composition represented by the second axis of a PCoA.

|                    | Archaea |          |        |        | Bacteria |          |        |        |
|--------------------|---------|----------|--------|--------|----------|----------|--------|--------|
|                    | Df      | SumOfSqs | F      | Pr(>F) | Df       | SumOfSqs | F      | Pr(>F) |
| <b>DOC</b>         | 1       | 0.49338  | 1.2732 | 0.088  | 1        | 0.49075  | 1.1705 | 0.041  |
| <b>NH4</b>         | 1       | 0.55260  | 1.4260 | 0.010  | 1        | 0.53506  | 1.2761 | 0.003  |
| <b>pH</b>          | 1       | 0.52177  | 1.3465 | 0.058  | 1        | 0.50370  | 1.2013 | 0.029  |
| <b>Temperature</b> | 1       | 0.66014  | 1.7036 | 0.008  | 1        | 0.58418  | 1.3933 | 0.005  |
| <b>DO</b>          | 1       | 0.49660  | 1.2815 | 0.090  | 1        | 0.48560  | 1.1582 | 0.075  |
| <b>Bac1</b>        | 1       | 0.35004  | 0.9033 | 0.711  | na       | na       | na     | na     |
| <b>Bac2</b>        | 1       | 0.48701  | 1.2568 | 0.096  | na       | na       | na     | na     |
| <b>Arc1</b>        | na      | na       | na     | na     | 1        | 0.46535  | 1.1099 | 0.130  |
| <b>Arc2</b>        | na      | na       | na     | na     | 1        | 0.48275  | 1.1514 | 0.069  |
| <b>Residual</b>    | 3       | 1.16253  |        |        | 3        | 1.25783  |        |        |
