# Supplementary material for: From Recharge, to Groundwater, to Discharge Areas in Aquifer Systems in Quebec (Canada): Shaping of Microbial Diversity and Community Structure by Environmental Factors
Source: MDPI journal article supplement (doi:10.3390/genes14010001), 2022-12-20
Supplement: s1 [file s1]

**Table S2.** Environmental variables used to run a correlation analysis between the archaeal and bacterial community composition and explanatory factors using db-RDA. DOC, dissolved organic carbon; DO, dissolved oxygen; Arc1, archaeal community composition represented by the first axis of a PCoA; Arc2, archaeal community composition represented by the second axis of a PCoA; Bac1, bacterial community composition represented by the first axis of a PCoA; Bac2, bacterial community composition represented by the second axis of a PCoA; V, Vaudreuil; SL, Saint-Lazare; CH; Covey Hill; K; Kenauk; RR, Rivière Rouge; ND, Notre-Dame-des-Laus; gw, groundwater.

| Sample      | DOC   | NH4      | pH   | Temp  | DO    | Bac1      | Bac2      | Arc1      | Arc2      |
|-------------|-------|----------|------|-------|-------|-----------|-----------|-----------|-----------|
|             | mg/L  | mg/L     |      | °C    | %     |           |           |           |           |
| V_gw_Jul18  | 0.99  | 0,000    | 6.1  | 7.56  | 6.3   | 0.130949  | -0.238791 | -0.512189 | 0.066855  |
| V_gw_Feb19  | 1.137 | 0,000    | 5.15 | 5.26  | 36.3  | 0.080967  | -0.174359 | -0.523668 | 0.070975  |
| V_gw_Apr19  | 2.825 | 0,028    | 7.2  | 3.8   | 103.3 | 0.128533  | -0.240541 | -0.508457 | 0.058852  |
| V_gw_May19  | 2.75  | 0,015    | 7.47 | 3.65  | 43.3  | 0.095332  | -0.209736 | -0.375605 | 0.021225  |
| SL_gw_Jul18 | 0.43  | 0,000    | 7.5  | 6.43  | 100   | 0.102874  | 0.054045  | 0.147483  | 0.447770  |
| SL_gw_May19 | 1.6   | 0,011    | 8.53 | 6.37  | 107   | 0.018147  | -0.027610 | 0.105474  | 0.382553  |
| CH_gw_Aug18 | 30.53 | 0,058    | 5.89 | 13.88 | 82.3  | 0.018115  | -0.008918 | 0.058259  | -0.002173 |
| K1_gw_Aug18 | 5.17  | 0,075    | 7.46 | 10.49 | 14.5  | -0.012429 | -0.066595 | 0.016933  | 0.021696  |
| K2_gw_Aug18 | 0.82  | 0,092    | 6.48 | 10.97 | 21.2  | -0.004814 | -0.027961 | 0.055366  | -0.044974 |
| RR_gw_Jul19 | 0.01  | 0,012416 | 6.23 | 10.1  | 0.75  | 0.003508  | -0.077124 | 0.025611  | 0.019976  |
| ND_gw_Jul19 | 9.9   | 0,310635 | 7.02 | 8.8   | 13.5  | 0.003087  | -0.067104 | 0.025503  | 0.019854  |
