# Supplementary material for: From Recharge, to Groundwater, to Discharge Areas in Aquifer Systems in Quebec (Canada): Shaping of Microbial Diversity and Community Structure by Environmental Factors
Source: MDPI journal article supplement (doi:10.3390/genes14010001), 2022-12-20
Supplement: s1 [file s1]

**Table S1.** Sequence statistics for the archaeal and bacterial 16S rRNA reads.**Archaea**

| <b>Sample</b>   | <b>Number of sequences after cleaning</b> | <b>Number of sequences after median sequencing depth</b> |
|-----------------|-------------------------------------------|----------------------------------------------------------|
| V_soil_Jul18    | 193                                       | na                                                       |
| V_soil_May19    | 10,337                                    | 28,433                                                   |
| SL_soil_Jul18   | 100                                       | na                                                       |
| SL_soil_May19   | 8,778                                     | 27,096                                                   |
| CH_peat_Aug18   | 107,017                                   | 23,780                                                   |
| K1_soil_Aug18   | 24,434                                    | 26,987                                                   |
| K2_soil_Aug18   | 20                                        | na                                                       |
| RR_soil_Jul19   | 12                                        | na                                                       |
| ND_soil_Jul19   | 5,047                                     | 26,591                                                   |
| V_snow_Feb19    | 13,847                                    | 27,447                                                   |
| SL_snow_Feb19   | 2,746                                     | 27,400                                                   |
| V_gw_Jul18      | 58,223                                    | 22,514                                                   |
| V_gw_Feb19      | 17,898                                    | 28,625                                                   |
| V_gw_Apr19      | 70,179                                    | 21,804                                                   |
| V_gw_May19      | 111,178                                   | 22,560                                                   |
| SL_gw_Jul18     | 2,739                                     | 27,387                                                   |
| SL_gw_May19     | 74,466                                    | 24,736                                                   |
| CH_gw_Aug18     | 62,342                                    | 21,901                                                   |
| K1_gw_Aug18     | 1,411                                     | 27,287                                                   |
| K2_gw_Aug18     | 74,020                                    | 24,152                                                   |
| RR_gw_Jul19     | 63,072                                    | 22,509                                                   |
| ND_gw_Jul19     | 12,829                                    | 26,514                                                   |
| SL_dis1_Jul18   | 27,385                                    | 27,385                                                   |
| SL_dis2a_Jul18  | 19,440                                    | 25,377                                                   |
| SL_dis2b_Jul18  | 21,907                                    | 26,006                                                   |
| V_riv_Jul18     | 43,216                                    | 29,229                                                   |
| V_riv_Apr19     | 40,386                                    | 29,068                                                   |
| V_riv_May19     | 97,678                                    | 23,624                                                   |
| SL_riv_Jul18    | 51,479                                    | 31,013                                                   |
| SL_riv_May19    | 186,689                                   | 21,909                                                   |
| CH_stream_Aug18 | 15,566                                    | 27,908                                                   |
| K1_riv_Aug18    | 26,662                                    | 26,953                                                   |
| K2_riv_Aug18    | 29,643                                    | 27,900                                                   |
| RR_riv_Jul19    | 44,468                                    | 32,118                                                   |
| ND_lake_Jul19   | 11,038                                    | 26,088                                                   |

**Bacteria**

| <b>Sample</b> | <b>Number of sequences after cleaning</b> | <b>Number of sequences after median sequencing depth</b> |
|---------------|-------------------------------------------|----------------------------------------------------------|
| V_soil_Jul18  | 111,143                                   | 33,357                                                   |
| V_soil_May19  | 7,182                                     | 34,467                                                   |
| SL_soil_Jul18 | 3,740                                     | 33,005                                                   |
| SL_soil_May19 | 6,572                                     | 32,867                                                   |
| CH_peat_Aug18 | 72,166                                    | 30,686                                                   |
| K1_soil_Aug18 | 16,432                                    | 32,870                                                   |
| K2_soil_Aug18 | 88                                        | na                                                       |
| RR_soil_Jul19 | 5,040                                     | 33,602                                                   |
| ND_soil_Jul19 | 7,109                                     | 33,498                                                   |

|                 |         |        |
|-----------------|---------|--------|
| V_snow_Feb19    | 60,818  | 35,736 |
| SL_snow_Feb19   | 133,828 | 30,680 |
| V_gw_Jul18      | 55,018  | 33,935 |
| V_gw_Feb19      | 63,480  | 34,958 |
| V_gw_Apr19      | 67,415  | 29,378 |
| V_gw_May19      | 89,547  | 29,219 |
| SL_gw_Jul18     | 42,562  | 33,184 |
| SL_gw_May19     | 59,627  | 35,622 |
| CH_gw_Aug18     | 40,296  | 33,964 |
| K1_gw_Aug18     | 129,302 | 32,401 |
| K2_gw_Aug18     | 47,703  | 34,156 |
| RR_gw_Jul19     | 12,703  | 33,507 |
| ND_gw_Jul19     | 11,240  | 33,375 |
| SL_dis1_Jul18   | 16,912  | 33,419 |
| SL_dis2a_Jul18  | 20,217  | 34,575 |
| SL_dis2b_Jul18  | 15,981  | 32,429 |
| V_riv_Jul18     | 41,667  | 34,423 |
| V_riv_Apr19     | 76,954  | 27,895 |
| V_riv_May19     | 81,915  | 27,563 |
| SL_riv_Jul18    | 47,151  | 34,362 |
| SL_riv_May19    | 87,303  | 26,908 |
| CH_stream_Aug18 | 18,180  | 33,567 |
| K1_riv_Aug18    | 25,637  | 31,215 |
| K2_riv_Aug18    | 18,347  | 34,567 |
| RR_riv_Jul19    | 15,895  | 32,599 |
| ND_lake_Jul19   | 10,448  | 32,426 |
