# Supplementary material for: From Recharge, to Groundwater, to Discharge Areas in Aquifer Systems in Quebec (Canada): Shaping of Microbial Diversity and Community Structure by Environmental Factors
Source: MDPI journal article supplement (doi:10.3390/genes14010001), 2022-12-20
Supplement: s1 [file s1]

**Table S3.** Amova analysis for the 3 groups (CA1, CA2, and CA3 for the Archaea, and CB1, CB2, and CB3 for the Bacteria) identified in the PCoA plot.

**Archaea**

| CA1-CA2 | Among   | Within   | Total   |
|---------|---------|----------|---------|
| SS      | 1.09575 | 1.79218  | 2.88793 |
| df      | 1       | 6        | 7       |
| MS      | 1.09575 | 0.298696 |         |

Fs: 3.66844

p-value: 0.038

| CA1-CA3 | Among    | Within   | Total   |
|---------|----------|----------|---------|
| SS      | 0.939161 | 3.99863  | 4.93779 |
| df      | 1        | 10       | 11      |
| MS      | 0.939161 | 0.399863 |         |

Fs: 2.34871

p-value: 0.004

| CA2-CA3 | Among   | Within   | Total   |
|---------|---------|----------|---------|
| SS      | 1.08658 | 3.77933  | 4.86591 |
| df      | 1       | 10       | 11      |
| MS      | 1.08658 | 0.377933 |         |

Fs: 2.87506

p-value: 0.003

**Bacteria**

| CB1-CB2 | Among    | Within   | Total   |
|---------|----------|----------|---------|
| SS      | 0.737508 | 2.41385  | 3.15136 |
| df      | 1        | 6        | 7       |
| MS      | 0.737508 | 0.402309 |         |

Fs: 1.83319

p-value: 0.031

| CA2-CA3 | Among    | Within  | Total   |
|---------|----------|---------|---------|
| SS      | 0.760516 | 4.3731  | 5.13361 |
| df      | 1        | 10      | 11      |
| MS      | 0.760516 | 0.43731 |         |

Fs: 1.73908

p-value: 0.002

| CA1-CA3 | Among    | Within   | Total   |
|---------|----------|----------|---------|
| SS      | 0.754024 | 4.36098  | 5.11501 |
| df      | 1        | 10       | 11      |
| MS      | 0.754024 | 0.436098 |         |

Fs: 1.72902

p-value: 0.001
